# Supplementary material for: Health economic evaluation of preventive digital public health interventions using decision-analytic modelling: a systematized review
Source: Springer Nature journal article supplement (doi:10.1186/s12913-023-09280-3), 2023-03-17
Supplement: MOESM1 [file 24637828]

Additional file 1: Search Strategy

| Database                | Date       | Search                                                                                                                                                                                                                                                                                                                                                                                                                                                                                                                                                                                                                                                                                                                                                                                                                                                                                                                                                                                                                                                                                                                                                                                                       | Hits |
|-------------------------|------------|--------------------------------------------------------------------------------------------------------------------------------------------------------------------------------------------------------------------------------------------------------------------------------------------------------------------------------------------------------------------------------------------------------------------------------------------------------------------------------------------------------------------------------------------------------------------------------------------------------------------------------------------------------------------------------------------------------------------------------------------------------------------------------------------------------------------------------------------------------------------------------------------------------------------------------------------------------------------------------------------------------------------------------------------------------------------------------------------------------------------------------------------------------------------------------------------------------------|------|
| PubMed                  | 04.12.2020 | ("app"[Title/Abstract] OR "apps"[Title/Abstract] OR "smartphone"[Title/Abstract] OR "mobile phone"[Title/Abstract] OR "Smartwatch"[Title/Abstract] OR "cellphone"[Title/Abstract] OR "internet"[Title/Abstract] OR "online"[Title/Abstract] OR "website"[Title/Abstract] OR "web-based" OR "fitness tracker"[Title/Abstract] OR "fitnesstracker"[Title/Abstract] OR "acceleromet*" [Title/Abstract] OR "activity monitor"[Title/Abstract] OR "digital health"[Title/Abstract] OR "digital public health"[Title/Abstract] OR "digital intervention*" [Title/Abstract] OR uhealth[Title/Abstract] OR u-health[Title/Abstract] OR m-health[Title/Abstract] OR e-health[Title/Abstract] OR ehealth[Title/Abstract] OR mhealth[Title/Abstract] OR "Mobile health"[Title/Abstract] OR telemedicine OR telehealth[Title/Abstract] OR Telecare[Title/Abstract]) AND ("cost-effectiveness"[title] OR "cost-benefit"[title] OR "cost-utility"[title] OR "cost-minimization"[title] OR "cost-minimisation"[title] OR "cost-consequences"[title] OR "cost-consequence"[title] OR "economic evaluation"[title])                                                                                                           | 970  |
| PubMed - Search details | -          | ("app"[Title/Abstract] OR "apps"[Title/Abstract] OR "smartphone"[Title/Abstract] OR "mobile phone"[Title/Abstract] OR "Smartwatch"[Title/Abstract] OR "cellphone"[Title/Abstract] OR "internet"[Title/Abstract] OR "online"[Title/Abstract] OR "website"[Title/Abstract] OR "web-based"[All Fields] OR "fitness tracker"[Title/Abstract] OR "fitnesstracker"[Title/Abstract] OR "acceleromet*" [Title/Abstract] OR "activity monitor"[Title/Abstract] OR "digital health"[Title/Abstract] OR "digital public health"[Title/Abstract] OR "digital intervention*" [Title/Abstract] OR "uhealth"[Title/Abstract] OR "u-health"[Title/Abstract] OR "m-health"[Title/Abstract] OR "e-health"[Title/Abstract] OR "ehealth"[Title/Abstract] OR "mhealth"[Title/Abstract] OR "Mobile health"[Title/Abstract] OR ("telemedicine"[MeSH Terms] OR "telemedicine"[All Fields] OR "telemedicine s"[All Fields]) OR "telehealth"[Title/Abstract] OR "Telecare"[Title/Abstract]) AND ("cost-effectiveness"[Title] OR "cost-benefit"[Title] OR "cost-utility"[Title] OR "cost-minimization"[Title] OR "cost-minimisation"[Title] OR "cost-consequences"[Title] OR "cost-consequence"[Title] OR "economic evaluation"[Title]) | -    |
| CINAHL                  | 04.12.2020 | ( TI ( ("app" OR "apps" OR "smartphone" OR "mobile phone" OR "Smartwatch" OR "cellphone" OR "internet" OR "online" OR "website" OR "web-based" OR "fitness tracker" OR "fitnesstracker" OR "acceleromet*" OR "activity monitor" OR (digital health) OR "digital public health" OR "digital intervention*" OR uhealth OR u-health OR m-health OR e-health OR ehealth OR mhealth OR (Mobile health) OR telemedicine OR telehealth OR Telecare) ) OR AB ( ("app" OR "apps" OR "smartphone" OR "mobile phone" OR "Smartwatch" OR "cellphone" OR "internet" OR "online" OR "website" OR "web-based" OR "fitness tracker" OR "fitnesstracker" OR "acceleromet*" OR "activity monitor" OR (digital health) OR "digital public health" OR "digital intervention*" OR uhealth OR u-health OR m-health OR e-health OR ehealth OR mhealth OR (Mobile health) OR telemedicine OR telehealth OR Telecare) ) ) AND TI ( ("cost-effectiveness" OR „cost-benefit“ OR „cost-utility“ OR „cost-minimization“ OR „cost-minimisation“ OR „cost-consequences“ OR "cost-consequence" OR „economic evaluation“) )                                                                                                                   | 314  |
| Web of Science          | 04.12.2020 | (TI=("app" OR "apps" OR "smartphone" OR "mobile phone" OR "Smartwatch" OR "cellphone" OR "internet" OR "online" OR "website" OR "web-based" OR "fitness tracker" OR "fitnesstracker" OR "acceleromet*" OR "activity monitor" OR (digital health) OR "digital public health" OR "digital intervention*" OR uhealth OR u-health OR m-health OR e-health OR ehealth OR mhealth OR (Mobile health) OR telemedicine OR telehealth OR Telecare) OR AB=("app" OR "apps" OR "smartphone" OR "mobile phone" OR "Smartwatch" OR "cellphone" OR "internet" OR "online" OR "website" OR "web-based" OR "fitness tracker" OR "fitnesstracker" OR "acceleromet*" OR "activity monitor" OR (digital health) OR "digital public health" OR "digital intervention*" OR uhealth OR u-health OR m-health OR e-health OR ehealth OR mhealth OR (Mobile health) OR telemedicine OR telehealth OR Telecare)) AND TI=("cost-effectiveness" OR „cost-benefit“ OR „cost-utility“ OR „cost-minimization“ OR „cost-minimisation“ OR „cost-consequences“ OR "cost-consequence" OR „economic evaluation“)                                                                                                                                 | 654  |

Search Update

|                |                            |                                                                                                                                                                                                                                                                                                                                                                                                                                                                                                                                                                                                                                                                                                                                                                                                                                                                                                                                                                                                                                                                                                                                                                   |     |
|----------------|----------------------------|-------------------------------------------------------------------------------------------------------------------------------------------------------------------------------------------------------------------------------------------------------------------------------------------------------------------------------------------------------------------------------------------------------------------------------------------------------------------------------------------------------------------------------------------------------------------------------------------------------------------------------------------------------------------------------------------------------------------------------------------------------------------------------------------------------------------------------------------------------------------------------------------------------------------------------------------------------------------------------------------------------------------------------------------------------------------------------------------------------------------------------------------------------------------|-----|
| PubMed         | 01.06.2022 (Search Update) | (("app"[Title/Abstract] OR "apps"[Title/Abstract] OR "smartphone"[Title/Abstract] OR "mobile phone"[Title/Abstract] OR "Smartwatch"[Title/Abstract] OR "cellphone"[Title/Abstract] OR "internet"[Title/Abstract] OR "online"[Title/Abstract] OR "website"[Title/Abstract] OR "web-based" OR "fitness tracker"[Title/Abstract] OR "fitnesstracker"[Title/Abstract] OR "acceleromet*"[Title/Abstract] OR "activity monitor"[Title/Abstract] OR "digital health"[Title/Abstract] OR "digital public health"[Title/Abstract] OR "digital intervention*"[Title/Abstract] OR uhealth[Title/Abstract] OR u-health[Title/Abstract] OR m-health[Title/Abstract] OR e-health[Title/Abstract] OR ehealth[Title/Abstract] OR mhealth[Title/Abstract] OR "Mobile health"[Title/Abstract] OR telemedicine OR telehealth[Title/Abstract] OR Telecare[Title/Abstract]) AND ("cost-effectiveness"[title] OR "cost-benefit"[title] OR "cost-utility"[title] OR "cost-minimization"[title] OR "cost-minimisation"[title] OR "cost-consequences"[title] OR "cost-consequence"[title] OR "economic evaluation"[title])) AND ("2020/12/05"[Date - Entry] : "2022/06/01"[Date - Entry])) | 210 |
| CINAHL         | 01.06.2022 (Search Update) | ( TI ( ("app" OR "apps" OR "smartphone" OR "mobile phone" OR "Smartwatch" OR "cellphone" OR "internet" OR "online" OR "website" OR "web-based" OR "fitness tracker" OR "fitnesstracker" OR "acceleromet*" OR "activity monitor" OR (digital health) OR "digital public health" OR "digital intervention*" OR uhealth OR u-health OR m-health OR e-health OR ehealth OR mhealth OR (Mobile health) OR telemedicine OR telehealth OR Telecare) ) OR AB ( ("app" OR "apps" OR "smartphone" OR "mobile phone" OR "Smartwatch" OR "cellphone" OR "internet" OR "online" OR "website" OR "web-based" OR "fitness tracker" OR "fitnesstracker" OR "acceleromet*" OR "activity monitor" OR (digital health) OR "digital public health" OR "digital intervention*" OR uhealth OR u-health OR m-health OR e-health OR ehealth OR mhealth OR (Mobile health) OR telemedicine OR telehealth OR Telecare) ) ) AND TI ( ("cost-effectiveness" OR „cost-benefit“ OR „cost-utility“ OR „cost-minimization“ OR „cost-minimisation“ OR „cost-consequences“ OR "cost-consequence" OR „economic evaluation“) ) AND (EM 20201205-20220601)                                             | 37  |
| Web of Science | 01.06.2022 (Search Update) | (TI=("app" OR "apps" OR "smartphone" OR "mobile phone" OR "Smartwatch" OR "cellphone" OR "internet" OR "online" OR "website" OR "web-based" OR "fitness tracker" OR "fitnesstracker" OR "acceleromet*" OR "activity monitor" OR (digital health) OR "digital public health" OR "digital intervention*" OR uhealth OR u-health OR m-health OR e-health OR ehealth OR mhealth OR (Mobile health) OR telemedicine OR telehealth OR Telecare) OR AB=(("app" OR "apps" OR "smartphone" OR "mobile phone" OR "Smartwatch" OR "cellphone" OR "internet" OR "online" OR "website" OR "web-based" OR "fitness tracker" OR "fitnesstracker" OR "acceleromet*" OR "activity monitor" OR (digital health) OR "digital public health" OR "digital intervention*" OR uhealth OR u-health OR m-health OR e-health OR ehealth OR mhealth OR (Mobile health) OR telemedicine OR telehealth OR Telecare)) AND TI=("cost-effectiveness" OR „cost-benefit“ OR „cost-utility“ OR „cost-minimization“ OR „cost-minimisation“ OR „cost-consequences“ OR "cost-consequence" OR „economic evaluation“)                                                                                     | 87  |

**Timespan: 2020-12-05 to 2022-01-06 (Index Date)**
