# Supplementary material for: Health economic evaluation of preventive digital public health interventions using decision-analytic modelling: a systematized review
Source: Springer Nature journal article supplement (doi:10.1186/s12913-023-09280-3), 2023-03-17
Supplement: MOESM2 [file 24637828]

## Additional file 2: Study characteristics

|                                                     | Type of economic evaluation | Model                     | Primary health outcome | Time horizon                          | Discount rate outcome | Discount rate cost | Measurement of effectiveness | Aim                      | Focused digital aspect            | Complementary digital tools | Face-to-face required                                  | Target population                | Location    | Study perspective                      | Funding            |
|-----------------------------------------------------|-----------------------------|---------------------------|------------------------|---------------------------------------|-----------------------|--------------------|------------------------------|--------------------------|-----------------------------------|-----------------------------|--------------------------------------------------------|----------------------------------|-------------|----------------------------------------|--------------------|
| Burn et al. [30]                                    | CUA                         | Markov model              | QALYs                  | Short term (2 years)                  | 5%                    | 5%                 | Single-study based           | Physical activity        | Text-messages                     | Web-based tools             | Yes                                                    | Woman with < 1 year old children | Australia   | Health service perspective             | Public funding     |
| Cheung et al. [41]                                  | CUA                         | Markov model              | QALYs                  | Lifetime, 10-year, 5-year, 2-year     | 1.5%                  | 4.0%               | Synthesis-based              | Smoking cessation        | Web-based (Personalized feedback) | Not identified              | Intervention is evaluated in addition to standard care | Smoker                           | Netherlands | Health care perspective                | Public funding     |
| Cleghorn et al. [37]                                | CUA                         | Multistate life table     | QALYs                  | Lifetime                              | 3%                    | 3%                 | Synthesis-based              | Weight loss              | Promotion for app                 | Not identified              | Not identified                                         | Overweight adults                | New Zealand | Health system perspective              | Public funding     |
| Cobiac et al. [31]                                  | CUA                         | Multistate life table     | DALYs                  | Lifetime                              | 3%                    | 3%                 | Synthesis-based              | Physical activity        | Mixed internet-based              | Not identified              | Not identified                                         | Adult general population         | Australia   | Health sector perspective              | Public funding     |
| Goryakin et al. [35]                                | CUA                         | Micro-simulation model    | DALYs                  | Medium term (2019-2050)               | 3%                    | 3%                 | Synthesis-based              | Weight loss              | App-based intervention            | Not identified              | Not identified                                         | Adult general population         | Italy       | Health system perspective              | Public funding     |
| Guerrero et al. [Only Mobile App intervention] [39] | CEA+CUA                     | Markov model              | QALYs                  | Lifetime                              | 3.5%                  | 3.5%               | Synthesis-based              | Smoking cessation        | Text-messages                     | Not identified              | Not identified                                         | Smoker                           | UK          | Health service perspective             | Public funding     |
| Jones et al. [38]                                   | CUA                         | Multistate life table     | QALYs                  | Lifetime                              | 3%                    | 3%                 | Single-study based           | Weightloss               | Smartphone-App (Promotion)        | Not identified              | Not identified                                         | New Zealand adult population     | New Zealand | Health system perspective              | Public funding     |
| Kruger et al. [42]                                  | CEA+CUA                     | Markov model              | QALYs                  | Lifetime                              | 1.5%                  | Not identified     | Synthesis-based              | Behaviour change (mixed) | Web-based                         | Not identified              | Not identified                                         | Young people starting university | UK          | UK Department of Health                | Public funding     |
| Miners et al. [36]                                  | CUA                         | Discrete Event Simulation | QALYs                  | Lifetime                              | 3.5%                  | 3.5%               | Synthesis-based              | Weight loss              | E-Learning Device                 | Not identified              | Not identified                                         | Overweight adults                | UK          | Health service perspective             | Public funding     |
| Mizdrak et al. [34]                                 | CUA                         | Multistate life table     | QALYs                  | Lifetime                              | 3%                    | 3%                 | Synthesis-based              | Physical activity        | Promotion for app                 | Not identified              | Not identified                                         | Adult general population         | New Zealand | Health system perspective              | Public funding     |
| Peels et al. [32]                                   | CEA+CUA                     | Markov model              | QALYs                  | Lifetime, 10-year, 5-year             | 1.5%                  | 4%                 | Single-study based           | Physical activity        | Web-based                         | Web-based tools             | Not identified                                         | > 50 years old person            | Netherlands | Health care perspective                | Public funding     |
| Cobos-Campos [40]                                   | CUA                         | Markov model              | QALYs                  | Life-time                             | 3%                    | 3%                 | Study-based                  | Smoking cessation        | Text messages                     | Not identified              | Yes, Health advice                                     | Smoker                           | Spain       | Health system + productivity losses    | Public funding     |
| Rondina et al. [33]                                 | CUA                         | Markov model              | QALYs                  | 5 year                                | 1.5%                  | 1.5%               | Single-study based           | Physical activity        | Smartphone App                    | Not identified              | Not identified                                         | Youth & Adults                   | Canada      | Public healthcare payer                | Mixed              |
| Song et al. [43]                                    | CUA                         | Discrete Event Simulation | QALYs                  | Medium term (Until the end of age 45) | 2%                    | 2%                 | Single-study based           | Menstrual management     | App-based intervention            | Not identified              | Not identified                                         | Woman aged 20-45 years           | Japan       | Health insurance + productivity losses | Industrial funding |
